# Supplementary material for: Synthesis of an amphibious superamphiphilic carbon-based materials with unique properties
Source: Royal Society of Chemistry journal article supplement (doi:10.1039/d0nj03784b), 2020-01-01
Supplement: d0nj03784b1.pdf [file d0nj03784b1.pdf]

## Supporting Information

### Synthesis of Amphibious Superamphiphilic Carbon-based Materials and Its Property

Xin Liu<sup>1, 2</sup>, Fengjuan Guo<sup>3</sup>, Yaping Dong<sup>1, 2</sup>, Wu Li<sup>2\*</sup>

<sup>1</sup> Key Laboratory of Comprehensive and Highly Efficient Utilization of Salt Lake Resources, Qinghai Institute of Salt Lakes, Chinese Academy of Sciences, 18 Xinning Road, Xining, Qinghai 810008, China

<sup>2</sup> Qinghai Engineering and Technology Research Center of Comprehensive Utilization of Salt Lake Resources, 18 Xinning Road, Xining, Qinghai 810008, China

<sup>3</sup> School of Chemical Engineering, Qinghai University, Xining 810016, China

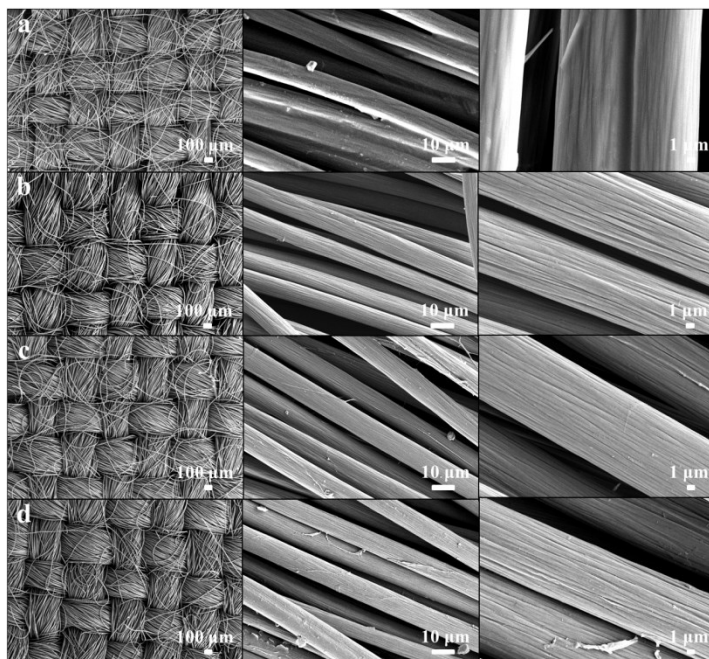

Fig. S1 SEM images of CC acidically oxidized at 120 °C for different time (a) 0 h, (b) 3 h, (c) 6 h, (d) 9 h

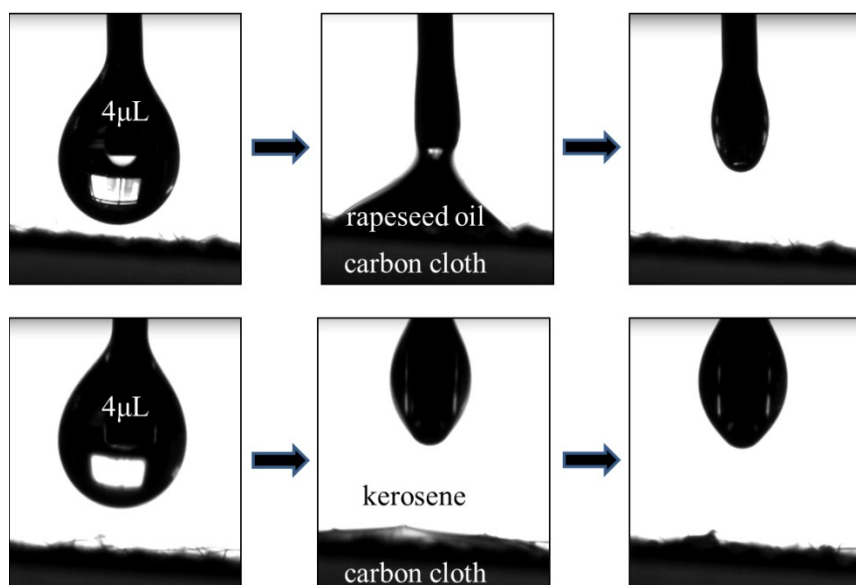

Fig. S2 The oil contact angle of carbon cloth tested at dry state in air

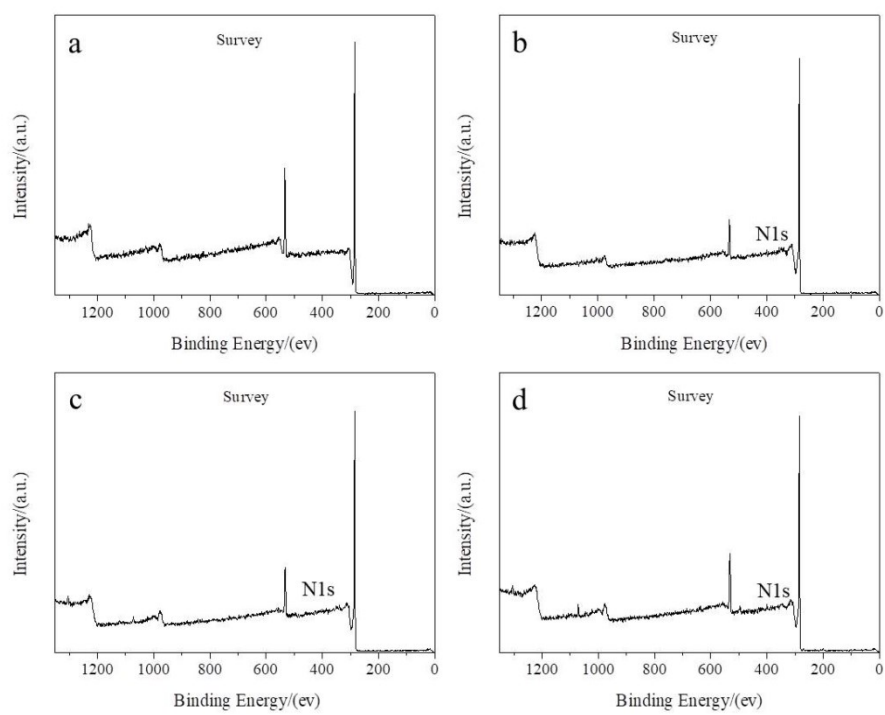

Fig. S3 XPS spectra of (a) carbon cloth, (b-d) carbon cloth oxidized at 120 °C for 3 h, 6 h, and 9 h, respectively.

Table S1 The composition of surface elements

| 样品编号                 | C (%) | O (%) | N(%) |
|----------------------|-------|-------|------|
| CC                   | 88.12 | 11.45 | 0.42 |
| CCO <sub>cd</sub> -3 | 93.5  | 6.09  | 0.42 |
| CCO <sub>cd</sub> -6 | 91.99 | 7.60  | 0.41 |
| CCO <sub>cd</sub> -9 | 90.45 | 8.78  | 0.77 |

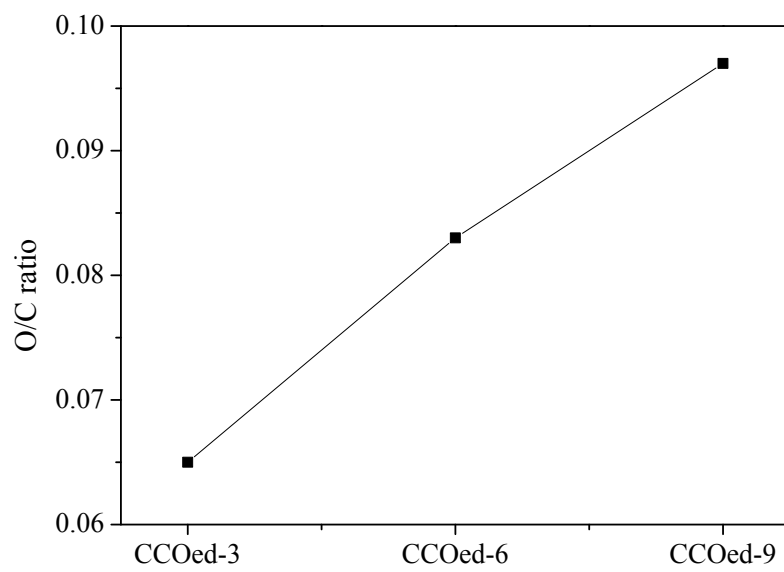

Fig. S4 The O/C ratios obtained from the XPS data

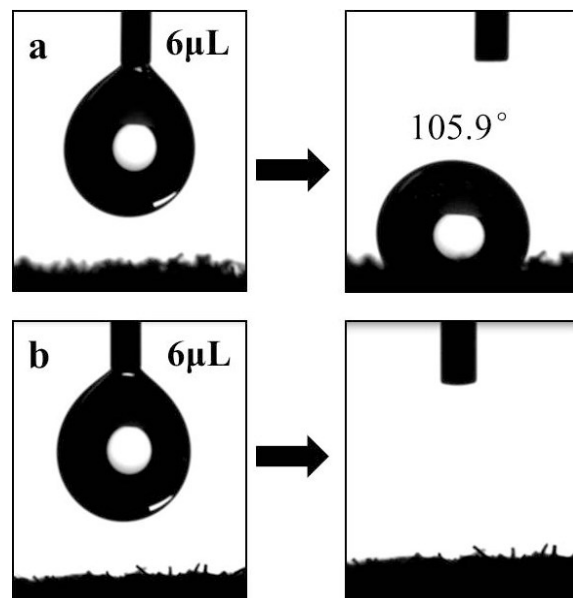

Fig. S5 The water contact angle of (a) PU foam and (b) oxidized PU foam in air

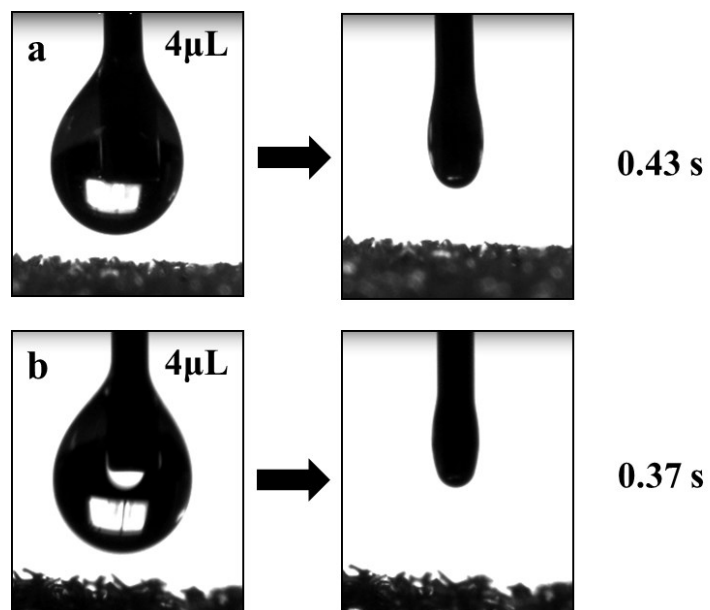

Fig. S6 The oil contact angle of (a) rapeseed oil and (b) kerosene on the surface of the oxidized PU foam in air

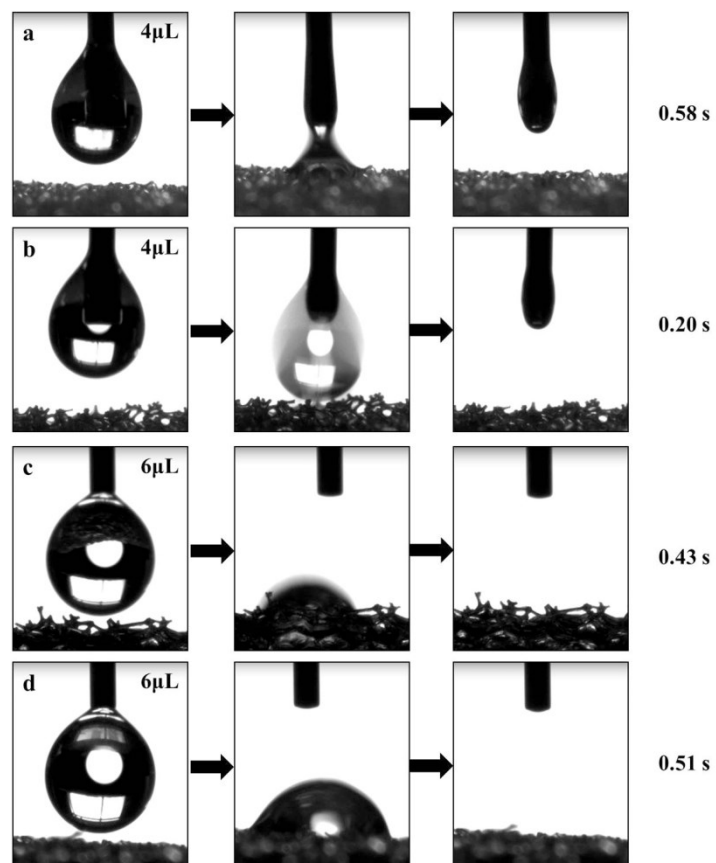

Fig. S7 The oil contact angle and water contact angle of PU foam oxidized at 80 °C for 3 h pre-wetted by water and oils, respectively. (a, b) oil contact angle of PU<sub>oed</sub> foam pre-wetted with water tested by rapeseed oil and kerosene, respectively. (c, d) water contact angle of PU<sub>oed</sub> foam pre-wetted with rapeseed oil and kerosene, respectively.
